# Supplementary material for: Formulation of Bismuth (Bi2O3) and Cerium Oxides (CeO2) Nanosheets for Boosted Visible Light Degradation of Methyl Orange and Methylene Blue Dyes in Water
Source: MDPI journal article supplement (doi:10.3390/catal12101197), 2022-10-08
Supplement: s1 [file s1]

## Supporting Information

### Formulation of Bismuth ( $\text{Bi}_2\text{O}_3$ ) and Cerium Oxides ( $\text{CeO}_2$ ) Nanosheets for Boosted Visible Light Degradation of Methyl Orange and Methylene Blue Dyes in Water

Khurram Shahzad<sup>1</sup>, Javier Fernandez Garcia<sup>2,3</sup>, Muhammad Imran Khan<sup>4</sup>, Abdallah Shanableh<sup>4</sup>,  
Naseem Ahmad Khan<sup>1</sup>, Aziz ur Rehman<sup>\*1</sup>

<sup>1</sup>*Institute of Chemistry, The Islamia University of Bahawalpur, Bahawalpur 63100, Pakistan*

<sup>2</sup>*Department of Chemical Engineering, University College London, Torrington Place, London WC1E 7JE, UK*

<sup>3</sup>*IQS School of Engineering, Universitat Ramon Llull, Via Augusta 390, 08017 Barcelona, Spain*

<sup>4</sup>*Research Institute of Sciences and Engineering (RISE), University of Sharjah, Sharjah 27272, United Arab Emirates*

*\*corresponding authors: Aziz ur Rehman; azizypk@yahoo.com*

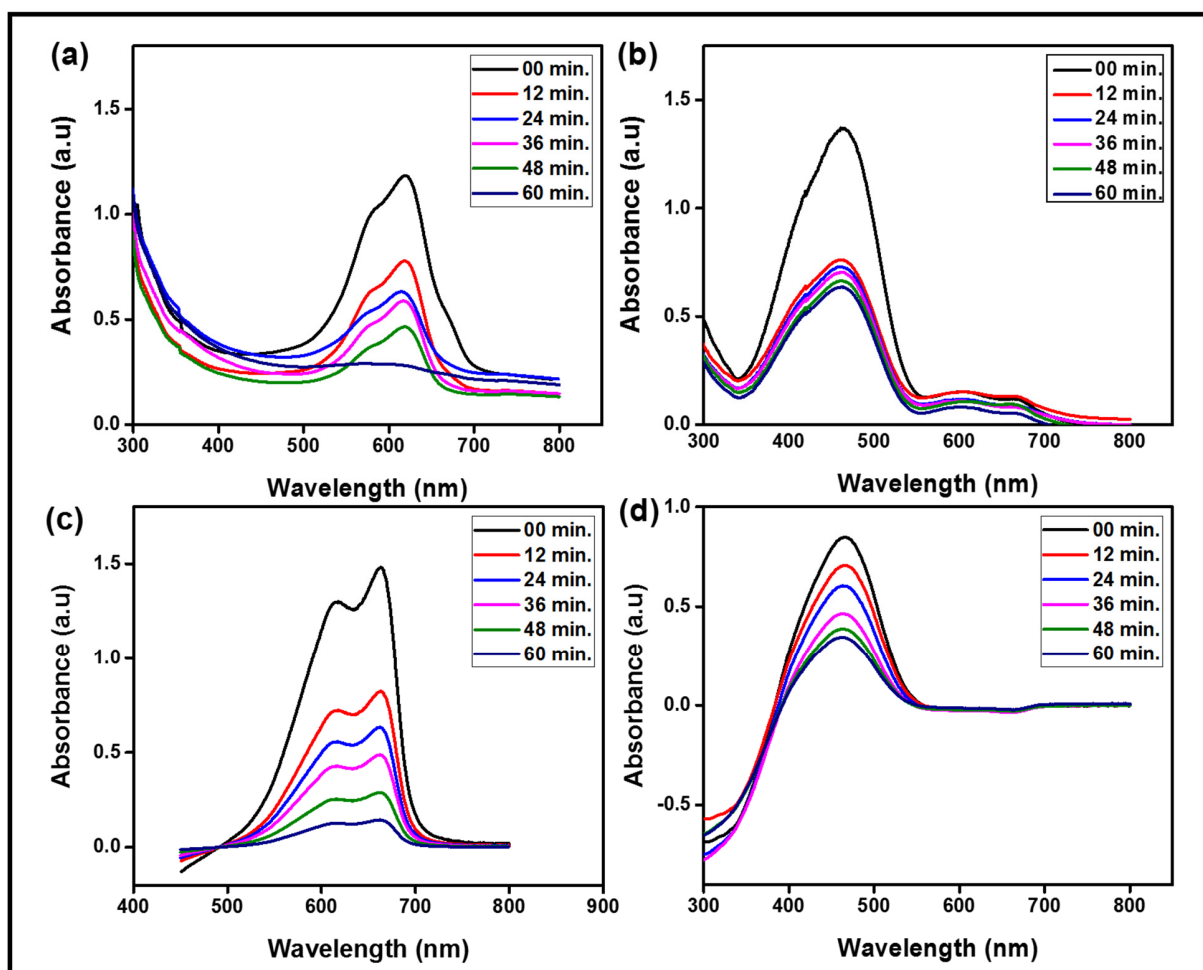

**Figure S1.** Absorption reduction of (a), (c) methylene blue and (b), (d) methyl orange by (a), (b) Bi@PMOS and (c), (d) Bi<sub>2</sub>O<sub>3</sub> under visible light.

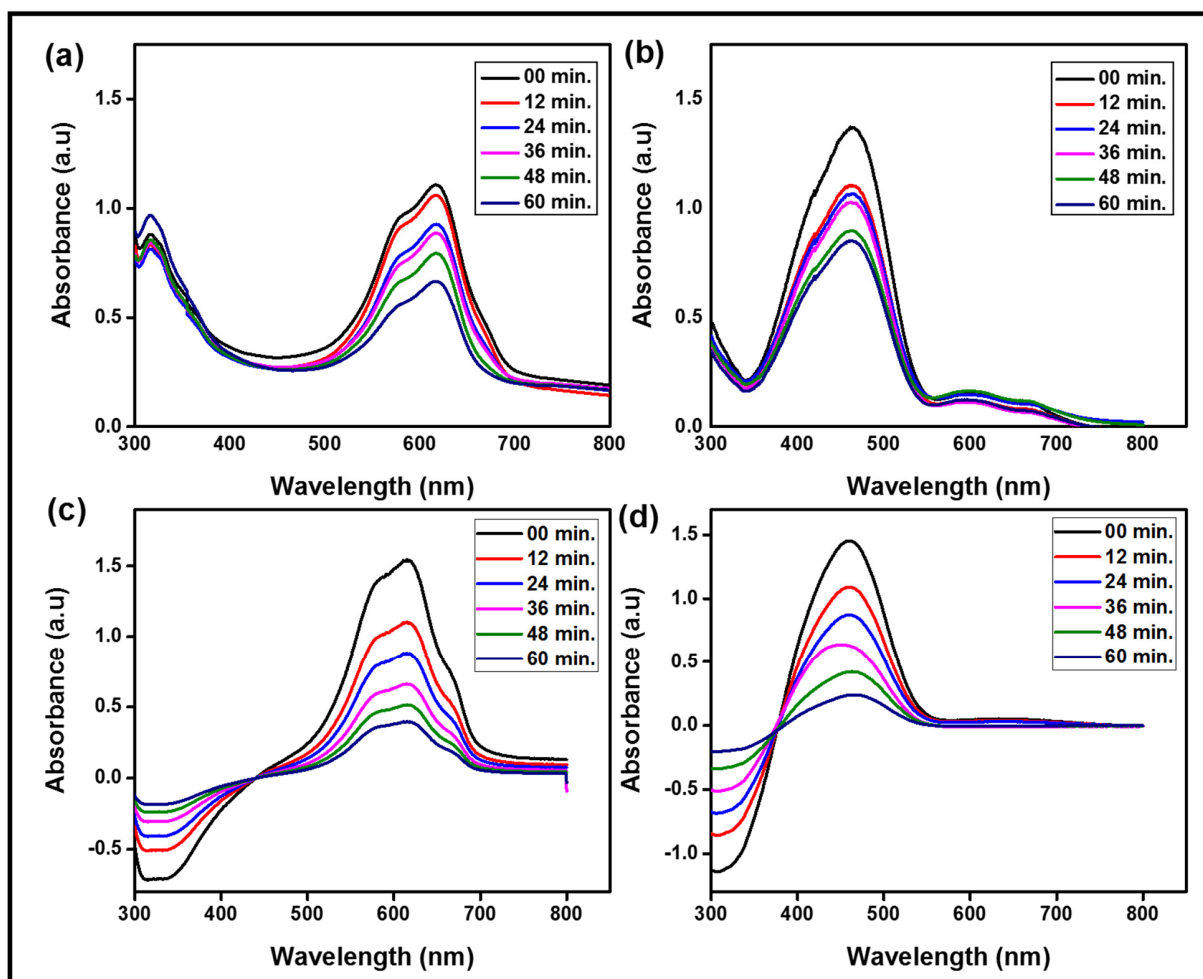

**Figure S2.** Absorption reduction of (a), (c) methylene blue and (b), (d) methyl orange by (a), (b) Ce@PMOS and (c), (d) CeO<sub>2</sub> under visible light.
